# Supplementary material
Source: PubMed Central journal article supplement (PMC9129112)
Supplement: glac084_suppl_supplementary_material.pdf [file glac084_suppl_supplementary_material.pdf]

## Supplementary Results

### eResults 1: Characteristics of the unmatched cohort without and with corticosteroids

|                                  | Total        | Without<br>corticosteroids | With<br>corticosteroids | P value |
|----------------------------------|--------------|----------------------------|-------------------------|---------|
|                                  | N=1579       | N=1044 (66.1%)             | N=535 (33.9%)           |         |
| Age (years), <b>median (IQR)</b> | 86.0 (81-91) | 86.4 (81-91)               | 85.2 (80-90)            | <0.001  |
| Female sex                       | 889 (56.3)   | 636 (60.9)                 | 253 (47.3)              | <0.001  |
| <b>Comorbidities</b>             |              |                            |                         |         |
| Dementia                         | 812 (51.4)   | 595 (57)                   | 217 (40.6)              | < 0.001 |
| Missing values                   | 3 (0.2)      | 2 (0.1)                    | 1 (0.2)                 |         |
| Depression                       | 424 (26.9)   | 312 (29.9)                 | 112 (20.9)              | < 0.001 |
| Missing values                   | 1 (0.1)      | 1 (0.1)                    | 0 (0)                   |         |
| Parkinson disease                | 67 (4.2)     | 45 (4.3)                   | 22 (4.1)                | 0.847   |
| Missing values                   | 2 (0.1)      | 2 (0.2)                    | 0 (0)                   |         |
| Hypertension                     | 1083 (68.6)  | 712 (68.2)                 | 371 (69.3)              | 0.642   |
| Diabetes                         | 422 (26.8)   | 258 (24.8)                 | 164 (30.7)              | < 0.001 |
| Missing values                   | 4 (0.3)      | 3 (0.3)                    | 1 (0.2)                 |         |
| Atrial fibrillation              | 461 (29.2)   | 321 (30.7)                 | 140 (26.2)              | 0.058   |
| Obesity                          | 177 (11.2)   | 105 (10.1)                 | 72 (13.5)               | 0.041   |
| Missing values                   | 18 (1.1)     | 11 (1)                     | 7 (1.3)                 |         |
| Chronic heart failure            | 369 (23.4)   | 236 (22.6)                 | 133 (24.9)              | 0.316   |
| Stroke                           | 326 (20.6)   | 223 (21.4)                 | 103 (19.3)              | 0.327   |
| Myocardial infraction            | 346 (21.9)   | 216 (20.7)                 | 130 (24.3)              | 0.105   |
| Peripheral vascular disease      | 190 (12)     | 113 (10.8)                 | 77 (14.4)               | 0.042   |
| Missing values                   | 4 (0.3)      | 4 (0.4)                    | 0 (0)                   |         |
| COPD                             | 218 (13.8)   | 130 (12.5)                 | 88 (16.4)               | 0.032   |
| Missing values                   | 4 (0.3)      | 4 (0.4)                    | 0 (0)                   |         |
| Peptic ulcer disease             | 105 (6.6)    | 78 (7.5)                   | 27 (5)                  | 0.066   |
| Missing values                   | 4 (0.3)      | 3 (0.3)                    | 1 (0.2)                 |         |
| Connective tissue disease        | 17 (1.1)     | 9 (0.9)                    | 8 (1.5)                 | 0.249   |
| Missing values                   | 1 (0.1)      | 1 (0.1)                    | 0 (0)                   |         |
| Liver disease                    | 5 (0.3)      | 4 (0.4)                    | 1 (0.2)                 | 0.12    |
| Missing values                   | 1 (0.1)      | 0 (0)                      | 1 (0.2)                 |         |

## eResults 1: Characteristics of the unmatched cohort without and with corticosteroids

|                                                 |                    |                   |                   |             |
|-------------------------------------------------|--------------------|-------------------|-------------------|-------------|
| Hemiplegia                                      | 65 (4.1)           | 50 (4.8)          | 15 (2.8)          | 0.061       |
| Missing values                                  | 1 (0.1)            | 0 (0)             | 1 (0.2)           |             |
| Chronic kidney disease                          | 572 (36.2)         | 386 (37)          | 186 (34.8)        | 0.402       |
| Missing values                                  | 4 (0.3)            | 2 (0.2)           | 2 (0.4)           |             |
| Solid tumor                                     | 173 (11)           | 114 (10.9)        | 59 (11)           | 0.958       |
| Missing values                                  | 5 (0.3)            | 4 (0.4)           | 1 (0.2)           |             |
| Leukemia/lymphoma                               | 32 (2)             | 9 (0.9)           | 23 (4.3)          | < 0.001     |
| AIDS                                            | 4 (0.3)            | 3 (0.3)           | 1 (0.2)           | 1           |
| Charlson Cormobidity Index, <b>median (IQR)</b> | 2.6 (1-4)          | 2.6 (1-4)         | 2.8 (1-4)         | 0.267       |
| Missing values                                  | 58 (3.7)           | 41 (3.9)          | 17 (3.2)          |             |
| <b>Functional autonomy</b>                      |                    |                   |                   |             |
| ADL, <b>median (IQR)</b>                        | 3.9 (2-6)          | 3.7 (2-6)         | 4.3 (3-6)         | < 0.001     |
| Missing values                                  | 43 (2.7)           | 32 (3.1)          | 11 (2.1)          |             |
| <b>CFS,</b>                                     |                    |                   |                   | <b>0.01</b> |
| <b>CFS 1-3, fit</b>                             | <b>355 (22.5)</b>  | <b>195 (18.7)</b> | <b>160 (29.9)</b> |             |
| <b>CFS 4, vulnerable</b>                        | <b>175 (11.2)</b>  | <b>115 (11.0)</b> | <b>60 (11.2)</b>  |             |
| <b>CFS 5-9, frail</b>                           | <b>1017 (64.4)</b> | <b>705 (67.5)</b> | <b>312 (58.3)</b> |             |
| <b>Missing values</b>                           | <b>32 (2)</b>      | <b>29 (2.8)</b>   | <b>3 (0.6)</b>    |             |
| Living in nursing home                          | 336 (21.3)         | 266 (25.5)        | 70 (13.1)         | < 0.001     |
| Missing values                                  | 4 (0.3)            | 4 (0.4)           | 0 (0)             |             |
| Polypharmacy (≥5 drugs)                         | 994 (63)           | 628 (60.2)        | 366 (68.4)        | < 0.001     |
| Missing values                                  | 4 (0.3)            | 3 (0.3)           | 1 (0.2)           |             |
| <b>Symptoms</b>                                 |                    |                   |                   |             |
| Max temperature (°C), <b>median (IQR)</b>       | 38.1 (37.7-38.9)   | 38.1 (37.7-38.9)  | 38.3 (37.8-39.0)  | 0.002       |
| Missing values                                  | 57 (3.6)           | 42 (4)            | 15 (2.8)          |             |
| Respiratory rate/min, <b>median (IQR)</b>       | 29.9 (24.0-35.5)   | 28.1 (24.0-32.0)  | 33.0 (28.0-40.0)  | <0.001      |
| Missing values                                  | 176 (11.1)         | 136 (13)          | 40 (7.5)          |             |
| Oxygen saturation <90%                          | 674 (42.7)         | 340 (32.6)        | 334 (62.4)        | <0.001      |
| Missing values                                  | 4 (0.3)            | 3 (0.3)           | 1 (0.2)           |             |
| qSOFA at admission                              |                    |                   |                   | 0.006       |
| 0                                               | 464 (29.4)         | 303 (29)          | 161 (30.1)        |             |
| 1                                               | 612 (38.8)         | 407 (39)          | 205 (38.3)        |             |
| 2                                               | 205 (13)           | 113 (10.8)        | 92 (17.2)         |             |
| 3                                               | 22 (1.4)           | 10 (1)            | 12 (2.2)          |             |
| Missing values                                  | 276 (17.5)         | 211 (20.2)        | 65 (12.1)         |             |

---

**eResults 1: Characteristics of the unmatched cohort without and with corticosteroids**
**Biology**

|                                                      |               |                 |                 |         |
|------------------------------------------------------|---------------|-----------------|-----------------|---------|
| Min lymphocytes (G/L), <b>median (IQR)</b>           | 0.8 (0.4-1.0) | 0.9 (0.5-1.1)   | 0.6 (0.3-0.8)   | < 0.001 |
| Missing values                                       | 38 (2.4)      | 31 (3)          | 7 (1.3)         |         |
| C-reactive protein level (mg/L), <b>median (IQR)</b> | 123 (51-175)  | 110 (36-159)    | 149 (83-199)    | < 0.001 |
| Missing values                                       | 43 (2.7)      | 37 (3.5)        | 6 (1.1)         |         |
| Cytolysis                                            | 447 (28.3)    | 244 (23.4)      | 203 (37.9)      | < 0.001 |
| Missing values                                       | 105 (6.6)     | 89 (8.5)        | 16 (3)          |         |
| Cholestasis                                          | 386 (24.4)    | 220 (21.1)      | 166 (31)        | < 0.001 |
| Missing values                                       | 107 (6.8)     | 90 (8.6)        | 17 (3.2)        |         |
| RT-PCR-positive                                      | 1507 (95.4)   | 983 (94.2)      | 524 (97.9)      | 0.003   |
| Missing values                                       | 15 (0.9)      | 13 (1.2)        | 2 (0.4)         |         |
| COVID-19 anomalies on chest CT                       | 839 (53.1)    | 391 (37.5)      | 448 (83.7)      | < 0.001 |
| Missing values                                       | 270 (17.1)    | 258 (24.7)      | 12 (2.2)        |         |
| Length of stay (days), <b>median (IQR)</b>           | 12.1 (6-0-    | 11.3 (6.0-14.0) | 13.6 (7.0-18.0) | < 0.001 |
| Missing values                                       | 15.0)         | 3 (0.3)         | 4 (0.7)         |         |
|                                                      | 7 (0.4)       |                 |                 |         |
| Destination at discharge                             |               |                 |                 | <0.001  |
| Return home                                          | 315 (19.9)    | 237 (22.7)      | 78 (14.6)       |         |
| Transfer in rehabilitation unit                      | 682 (43.2)    | 509 (48.8)      | 173 (32.3)      |         |
| Death                                                | 465 (29.4)    | 224 (21.5)      | 241 (45)        |         |
| Other*                                               | 112 (7.1)     | 70 (6.7)        | 42 (7.9)        |         |

---

Notes: ADL = activities of daily living; **CFS = Clinical Frailty Score**; COPD = chronic obstructive pulmonary disease; CT = computed tomography; qSOFA = quick Sequential Organ Failure Assessment

\* transfer to other units (intensive care unit, palliative care unit, other medical ward).

Data are number (%) unless indicated.

---

## Supplementary material

**eMethods 1:** STROBE Statement—Checklist of items that should be included in reports of cohort studies

**eMethods 2:** Original statistical analysis plan

### **eMethods 1: STROBE Statement—Checklist of items that should be included in reports of cohort studies**

|                              | <b>Item No</b> | <b>Recommendation</b>                                                                                                                                                                                                                                                    |
|------------------------------|----------------|--------------------------------------------------------------------------------------------------------------------------------------------------------------------------------------------------------------------------------------------------------------------------|
| <b>Title and abstract</b>    | 1              | (a) Indicate the study's design with a commonly used term in the title or the abstract<br>→ <a href="#">Page 1,2</a><br>(b) Provide in the abstract an informative and balanced summary of what was done and what was found<br>→ <a href="#">Page 2</a>                  |
| <b>Introduction</b>          |                |                                                                                                                                                                                                                                                                          |
| Background/rationale         | 2              | Explain the scientific background and rationale for the investigation being reported<br>→ <a href="#">Page 3</a>                                                                                                                                                         |
| Objectives                   | 3              | State specific objectives, including any prespecified hypotheses<br>→ <a href="#">Page 4</a>                                                                                                                                                                             |
| <b>Methods</b>               |                |                                                                                                                                                                                                                                                                          |
| Study design                 | 4              | Present key elements of study design early in the paper<br>→ <a href="#">Page 4</a>                                                                                                                                                                                      |
| Setting                      | 5              | Describe the setting, locations, and relevant dates, including periods of recruitment, exposure, follow-up, and data collection<br>→ <a href="#">Page 4,5</a>                                                                                                            |
| Participants                 | 6              | (a) Give the eligibility criteria, and the sources and methods of selection of participants. Describe methods of follow-up<br>→ <a href="#">Page 4</a><br>(b) For matched studies, give matching criteria and number of exposed and unexposed → <a href="#">Page 6,7</a> |
| Variables                    | 7              | Clearly define all outcomes, exposures, predictors, potential confounders, and effect modifiers. Give diagnostic criteria, if applicable<br>→ <a href="#">Page 5</a>                                                                                                     |
| Data sources/<br>measurement | 8*             | For each variable of interest, give sources of data and details of methods of assessment (measurement). Describe comparability of assessment methods if there is more than one group<br>→ <a href="#">Page 5</a>                                                         |
| Bias                         | 9              | Describe any efforts to address potential sources of bias<br>→ <a href="#">Page 6,7</a>                                                                                                                                                                                  |
| Study size                   | 10             | Explain how the study size was arrived at<br>→ <a href="#">Page 6</a>                                                                                                                                                                                                    |
| Quantitative variables       | 11             | Explain how quantitative variables were handled in the analyses. If applicable, describe which groupings were chosen and why<br>→ <a href="#">Page 6</a>                                                                                                                 |
| Statistical methods          | 12             | (a) Describe all statistical methods, including those used to control for confounding<br>→ <a href="#">Page 6,7</a><br>(b) Describe any methods used to examine subgroups and interactions<br>→ <a href="#">Page 7</a>                                                   |

|                          |     |                                                                                                                                                                                                                                                                                                                                                                                                                                                                                                         |
|--------------------------|-----|---------------------------------------------------------------------------------------------------------------------------------------------------------------------------------------------------------------------------------------------------------------------------------------------------------------------------------------------------------------------------------------------------------------------------------------------------------------------------------------------------------|
|                          |     | (c) Explain how missing data were addressed<br>→ <a href="#">Page 7</a>                                                                                                                                                                                                                                                                                                                                                                                                                                 |
|                          |     | (d) If applicable, explain how loss to follow-up was addressed                                                                                                                                                                                                                                                                                                                                                                                                                                          |
|                          |     | (e) Describe any sensitivity analyses                                                                                                                                                                                                                                                                                                                                                                                                                                                                   |
| <b>Results</b>           |     |                                                                                                                                                                                                                                                                                                                                                                                                                                                                                                         |
| Participants             | 13* | (a) Report numbers of individuals at each stage of study—eg numbers potentially eligible, examined for eligibility, confirmed eligible, included in the study, completing follow-up, and analysed<br>→ <a href="#">Page 7, Figure 1</a><br>(b) Give reasons for non-participation at each stage<br>→ <a href="#">Figure 1</a><br>(c) Consider use of a flow diagram<br>→ <a href="#">Figure 1</a>                                                                                                       |
| Descriptive data         | 14* | (a) Give characteristics of study participants(eg demographic, clinical, social) and information on exposures and potential confounders<br>→ <a href="#">Page 7, Table 1, Table 4, eResults 1</a><br>(b) Indicate number of participants with missing data for each variable of interest<br>→ <a href="#">Page 7, Table 1 – 2, eResults 1</a><br>(c) Summarise follow-up time (eg, average and total amount)<br>→ <a href="#">Page 7, Table 1 – 2, eResults 1</a>                                       |
| Outcome data             | 15* | Report numbers of outcome events or summary measures over time<br>→ <a href="#">Page 8, Table 1 – 2– 4, eResults 1</a>                                                                                                                                                                                                                                                                                                                                                                                  |
| Main results             | 16  | (a) Give unadjusted estimates and, if applicable, confounder-adjusted estimates and their precision (eg, 95% confidence interval). Make clear which confounders were adjusted for and why they were included<br>→ <a href="#">Page 8, Table 1 – 3, eResults 1</a><br>(b) Report category boundaries when continuous variables were categorized<br>→ <a href="#">Page 8, Table 3</a><br>(c) If relevant, consider translating estimates of relative risk into absolute risk for a meaningful time period |
| Other analyses           | 17  | Report other analyses done—eg analyses of subgroups and interactions, and sensitivity analyses                                                                                                                                                                                                                                                                                                                                                                                                          |
| <b>Discussion</b>        |     |                                                                                                                                                                                                                                                                                                                                                                                                                                                                                                         |
| Key results              | 18  | Summarise key results with reference to study objectives<br>→ <a href="#">Page 9</a>                                                                                                                                                                                                                                                                                                                                                                                                                    |
| Limitations              | 19  | Discuss limitations of the study, taking into account sources of potential bias or imprecision. Discuss both direction and magnitude of any potential bias<br>→ <a href="#">Page 11,12</a>                                                                                                                                                                                                                                                                                                              |
| Interpretation           | 20  | Give a cautious overall interpretation of results considering objectives, limitations, multiplicity of analyses, results from similar studies, and other relevant evidence<br>→ <a href="#">Page 9-11</a>                                                                                                                                                                                                                                                                                               |
| Generalisability         | 21  | Discuss the generalisability (external validity) of the study results<br>→ <a href="#">Page 11,12</a>                                                                                                                                                                                                                                                                                                                                                                                                   |
| <b>Other information</b> |     |                                                                                                                                                                                                                                                                                                                                                                                                                                                                                                         |
| Funding                  | 22  | Give the source of funding and the role of the funders for the present study and, if applicable, for the original study on which the present article is based<br>→ <a href="#">Page 13</a>                                                                                                                                                                                                                                                                                                              |

\*Give information separately for exposed and unexposed groups.

**Note:** An Explanation and Elaboration article discusses each checklist item and gives methodological background and published examples of transparent reporting. The STROBE checklist is best used in conjunction with this article (freely available on the Web sites of PLoS Medicine at <http://www.plosmedicine.org/>, Annals of

Internal Medicine at <http://www.annals.org/>, and Epidemiology at <http://www.epidem.com/>). Information on the STROBE Initiative is available at <http://www.strobe-statement.org>.

## **eMethods 2: Original statistical analysis plan**

### **1. Patients:**

From March 13 to April 15, 2020, 821 patients with confirmed COVID-19 were enrolled from 13 acute COVID-19 geriatric wards in Paris area were included in the GERICOCO cohort.

From November 2020 to May 2021, all consecutive patients treated with corticoids admitted to one of the participating acute COVID-19 geriatric wards in Paris area will be evaluated for eligibility. Patients without social security or who refused the use of their medical data will be excluded.

COVID-19 will be confirmed by real-time reverse polymerase chain reaction (RT-PCR) for SARS-CoV-2 or computerized tomography (CT) scan, according to World Health Organization (WHO) (2).

### **2. Outcomes:**

- Compare the in-hospital mortality rate of geriatric patients hospitalized for COVID-19, treated or not with corticosteroid.

### **3. Descriptive and explanatory variables:**

#### Baseline characteristics

- Age
- Sex
- Home or nursing home residence
- Previous medical history of :
  - o Dementia
  - o Depression
  - o Parkinson disease
  - o Hypertension
  - o Diabetes
  - o Atrial fibrillation
  - o Obesity (BMI > 30 kg/m<sup>2</sup>)
  - o Myocardial infraction
  - o Chronic heart failure
  - o Stroke
  - o Peripheral vascular disease
  - o Hemiplegia
  - o COPD
  - o Chronic kidney injuries (Cockroft < 30 mL/min)
  - o Connective tissue disease

- Liver disease
- Cancer
- Lymphoma
- AIDS
- Polypharmacy (use of 5 or more chronic medicines per day)
- Comorbidity severity assessed with the Charlson comorbidity index (4)
- Functional status assessed with the Activities of Daily Living (ADL) scale (6 basic human functions: bathing, dressing, toileting, transfer, continence and feeding; 1 point for each function) (5)
- Frailty assessed with the Clinical Frailty Score (CFS) to define patients as fit (1-3), vulnerable (4) and frail (5-9) (6)

### COVID-19

- Date of COVID-19 onset
- Date of the initial chest CT scan and its results (specific COVID-19 anomalies: yes or no)
- Date of the initial nasopharyngeal swab tested by RT-PCR and its results.
- Symptoms at onset:
  - Temperature ( $^{\circ}\text{C}$ )
  - Blood pressure  $< 100$  mmHg
  - Respiratory rate  $\geq 22$
  - Oxygen saturation  $< 90\%$
  - Dyspnea
  - Cough
  - O<sub>2</sub> flow (L/min)
  - Confusion
  - Glasgow score  $< 15$  (range from 3-15 with points on eyes responses from 1 to 4, verbal responses from 1 to 5 and motor response from 1 to 6) (7)
  - Quick Sequential Organ Failure Assessment (qSOFA) score (range 0–3, with 1 point each for systolic hypotension [ $\leq 100$  mm Hg], tachypnea [ $\geq 22/\text{min}$ ], or altered consciousness [Glasgow coma score  $< 14$ ]) (8)
- Interval from symptom onset to admission in a geriatric ward
- Complications during hospitalization (with their start date):
  - respiratory rate  $\geq 22/\text{min}$
  - oximetry  $< 90\%$
  - dyspnea
  - delirium or altered consciousness (Glasgow coma score  $< 14$ )
  - thromboembolic events
  - acute cardiac injury, diagnosed with serum level of troponin above the 99<sup>th</sup> percentile upper reference limit or new abnormalities observed on electrocardiography and echocardiography routinely performed.
  - acute atrial fibrillation

- stroke
- acute kidney injury (AKI), identified according to the Kidney Disease Improving Global Outcomes (KDIGO) definition. (9)
- stool impaction
- admission to an ICU
- palliative decision
- Routine blood tests
  - complete blood count
  - renal and liver function
  - C-reactive protein level
- Specific treatments (with their start date)
  - antiviral therapy
  - corticosteroid therapy
  - hydroxychloroquine
  - anticytokine or immunomodulatory agents
- Corticosteroid therapy:
  - Type of corticoid
  - Dosage equivalent in dexamethasone (mg/L)
  - Treatment duration
- Nonspecific treatments
  - respiratory support
  - hydration
  - blood transfusion
  - antibiotic therapy
  - proton pump inhibitor
  - prophylactic anticoagulation
  - midazolam and morphine therapies
- Corticotherapy side effects and their dates
  - Gastro-intestinal hemorrhage
  - Decompensated diabetes
  - Acute hypertension (> 180/100 mmhg)
  - Delirium
  - Behavioral disorder
  - Secondary infections
  - Glucocorticoid disruption
- The status (alive or dead) and the destination at discharge (home, including nursing home; rehabilitation center; or other, including palliative care center) were also recorded.
- Interval from symptom onset to death
- Length of hospital stay



#### 4. Statistical analysis

The statistical plan of the study was established before the statistical analysis. In order to demonstrate a reduction of 6% of the in-hospital mortality with the use of corticosteroids, we estimated that 690 subjects per group were needed (power 80%, alpha risk 0.05) based on our deceased rate of 31% on our first cohort.

Quantitative variables will be described by their median (IQR) and number of missing data. Normality will be assessed by graphical representation of their distribution. Qualitative variables will be described by frequency, percentage and number of missing data.

Patient characteristics will be described overall and according to treatment status on a supplementary material.

In-hospital mortality rate will be compared between patients with and without corticosteroids using the propensity score (PS) framework (11,12). We will create a new dataset in which the probability to receive corticosteroids or not is equally balanced among patients' baseline characteristics (age, sex, Charlson comorbidity index, depression, Parkinson disease, obesity, polypharmacy, CFS, ADL score, institutionalization). Patients with or without corticosteroids will be matched using a 1:1 nearest neighbor matching algorithm without replacement, with a caliper of 0.1 of the standard deviation of the PS on the logit scale. Covariate balance between the two groups was assessed after matching, and we considered an absolute standardized difference less than 0.1 as evidence of balance.

Univariate comparison between treated and non-treated patients will be performed, using Student's t-test or Wilcoxon's, Chi square test, or Fisher's exact test, as appropriate.

A logistic mixed model will be performed with a center effect as a random effect to assess independent variables associated with in-hospital mortality, and adjusted Odds Ratio (ORs) with their 95% confidence intervals will be calculated. Variables included in the models will be all variables with  $p < 0.10$  on univariate analysis (stepwise selection). Variables excluded during the stepwise process which are found significantly associated to the outcome will be forced in to model. Multicollinearity bias will be checked using the variance inflation factor.

We will assess for missing values and their distribution in the 2 cohorts and prepare a specific strategy according to the results.

All tests will be 2-sided, and  $P < 0.05$  will be considered statistically significant.

All statistical analysis will be performed using R (R v4.0.0.) software.

#### 5. Bibliography

1. Zerah L, Baudouin É, Pépin M, Mary M, Krypciak S, Bianco C, et al. Clinical Characteristics and Outcomes of 821 Older Patients With SARS-Cov-2 Infection Admitted to Acute Care Geriatric Wards. Newman AB, éditeur. J Gerontol Ser A. 26 août 2020;glaa210.
2. COVID-19 Clinical management: living guidance [Internet]. [cité 23 juill 2021]. Disponible sur: <https://www.who.int/publications-detail-redirect/WHO-2019-nCoV-clinical-2021-1>
3. Gnjjidic D, Hilmer SN, Blyth FM, Naganathan V, Waite L, Seibel MJ, et al. Polypharmacy cutoff and outcomes: five or more medicines were used to identify community-dwelling older men at risk of different adverse outcomes. J Clin Epidemiol. sept 2012;65 (9):989-95.
4. Charlson M, Szatrowski TP, Peterson J, Gold J. Validation of a combined comorbidity index. J Clin Epidemiol. 1 nov 1994;47 (11):1245-51.
5. Katz S, Akpom CA. 12. Index of ADL: Med Care. mai 1976;14 (Supplement):116-8.
6. Rockwood K. Frailty and its definition: a worthy challenge. J Am Geriatr Soc. 2005;53:1069-1070.
7. Teasdale G, Jennett B. Assessment of coma and impaired consciousness. A practical scale. Lancet Lond Engl. 13 juill 1974;2 (7872):81-4.

8. Seymour CW, Liu VX, Iwashyna TJ, Brunkhorst FM, Rea TD, Scherag A, et al. Assessment of Clinical Criteria for Sepsis: For the Third International Consensus Definitions for Sepsis and Septic Shock (Sepsis-3). *JAMA*. 23 févr 2016;315 (8):762.
9. Kellum JA, Lameire N, KDIGO AKI Guideline Work Group. Diagnosis, evaluation, and management of acute kidney injury: a KDIGO summary (Part 1). *Crit Care Lond Engl*. 4 févr 2013;17 (1):204.
10. Dexamethasone in Hospitalized Patients with Covid-19 | *NEJM* [Internet]. [cité 16 déc 2021]. Disponible sur: <https://www.nejm.org/doi/full/10.1056/nejmoa2021436>
11. Austin PC. Optimal caliper widths for propensity-score matching when estimating differences in means and differences in proportions in observational studies. *Pharm Stat*. avr 2011;10 (2):150-61.
12. Austin PC. An Introduction to Propensity Score Methods for Reducing the Effects of Confounding in Observational Studies. *Multivar Behav Res*. mai 2011;46 (3):399-424.
